# Supplementary material for: Coordinated Activation of Candidate Proto-Oncogenes and Cancer Testes Antigens via Promoter Demethylation in Head and Neck Cancer and Lung Cancer
Source: PLoS One. 2009 Mar 23;4(3):e4961. doi: 10.1371/journal.pone.0004961 (PMC2654921; doi:10.1371/journal.pone.0004961)
Supplement: Table S2 — Target genes ranked on 5-aza/TSA upfold regulation in our normalized cell lines. (0.02 MB XLS) [file pone.0004961.s004.xls]

## Sheet: Sheet1
Name	Accession	CpG Island	Meth Nls	Unmeth Tumor	Fold Change
transketolase-like 1	X91817	Y	Y	Y	132
"tubulin	AL533838	Y	N		15.2
sushi domain containing 3	AW966474	Y	N		13.1
"peptidyl arginine deiminase	NM_016233	N	N		10.9
calcyphosine	NM_004058	N	N		10.8
Ras-related associated with diabetes	NM_004165	Y	N		10.3
"myosin	AF020768	N	N		9.6
"Rhesus blood group	NM_016321	Y	N		9.4
ubiquitin carboxyl-terminal esterase L1 (ubiquitin thiolesterase)	NM_004181	Y	N		8.9
Ras-related associated with diabetes	NM_004165	Y	N		8.5
"H19	AL575306	Y	Y	Y	7.7
"Serine (or cysteine) proteinase inhibitor	AL049245	Y	Y	N	7.7
RAS guanyl releasing protein 2 (calcium and DAG-regulated)	AI688812	Y	N		7
ovary-specific acidic protein	AF329088	Y	N		6.9
insulin growth factor-like family member 1	AA195677	N	N		6.8
B-box and SPRY domain containing	AJ276691	Y	N		6.6
hypothetical protein FLJ14627	AW299700	N	N		6.5
"serine (or cysteine) proteinase inhibitor	BC002538	Y	N		6.3
hypothetical protein FLJ32942	BG150433	N	N		6.3
transmembrane 7 superfamily member 2	AF096304	Y	N		6.2
LOC440570	AI733297	N	N		6
fatty acid 2-hydroxylase	NM_024306	Y	N		5.6
LOC441546	BE671925	N	N		5.6
"transglutaminase 2 (C polypeptide	M98478	Y	Y	N	5.6
"SPANX family	NM_013453	N	N		5.5
carnitine palmitoyltransferase 1C	AL565745	Y	N		5.3
"ras homolog gene family	NM_019034	Y	N		5.1
"serine (or cysteine) proteinase inhibitor	NM_002615	N	N		5.1
neuronal guanine nucleotide exchange factor	AV703769	N	N		4.3
"mannosidase	NM_020379	Y	N		4.3
hypothetical protein LOC254848	BC043614	N	N		4.3
"actin binding LIM protein family	AI240129	Y	N		4.2
similar to RIKEN cDNA A230078I05 gene	AL524643	Y	N		4.1
prostaglandin-endoperoxide synthase 1 (prostaglandin G/H synthase and cyclooxygenase)	S36219	Y	N		4
prostaglandin-endoperoxide synthase 1 (prostaglandin G/H synthase and cyclooxygenase)	BE613133	Y	N		3.9
"ras homolog gene family	AF239923	Y	N		3.9
chromosome 19 open reading frame 28	NM_021731	Y	Y	Y	3.7
prostaglandin-endoperoxide synthase 1 (prostaglandin G/H synthase and cyclooxygenase)	NM_000962	Y	N		3.6
chloride intracellular channel 3	NM_004669	N	N		3.5
"ras homolog gene family	BC018208	Y	Y	N	3.5
espin	AL136880	Y	N		3.4
"ATPase	AB032963	N	N		3.3
sortilin 1	BE622952	N	N		3.3
"sodium channel	NM_001037	Y	N		3.2
microtubule-associated protein 1 light chain 3 alpha /// microtubule-associated protein 1 light chain 3 alpha	AF276658	Y	N		3.2
synaptogyrin 3	NM_004209	Y	N		3
